# Supplementary material for: OMEF biochip for evaluating red blood cell deformability using dielectrophoresis as a diagnostic tool for type 2 diabetes mellitus
Source: Royal Society of Chemistry journal article supplement (doi:10.1039/d3lc01016c), 2024-01-01
Supplement: d3lc01016c2.pdf [file d3lc01016c2.pdf]

# Supplementary Table

## OMEF Biochip for Evaluating Red Blood Cell Deformability Using Dielectrophoresis as a Diagnostic Tool for Type 2 Diabetes Mellitus

Dima Samer Ali<sup>a,b</sup>, Samuel Olufemi Sofela<sup>a</sup>, Muhammedin Deliorman<sup>a</sup>, Pavithra Sukumar<sup>a</sup>, Ma-sum Abdulhamid<sup>a</sup>, Sherifa Yakubu<sup>a</sup>, Ciara Rooney<sup>c</sup>, Ryan Garrod<sup>c</sup>, Anoop Menachery<sup>a,d</sup>, Rabih Hijazi<sup>c</sup>, Hussein Saadi<sup>c</sup>, Mohammad A. Qasaimeh<sup>a,b,\*</sup>

<sup>a</sup> *Division of Engineering, New York University Abu Dhabi (NYUAD), Abu Dhabi, UAE*

<sup>b</sup> *Department of Mechanical and Aerospace Engineering, New York University, New York, USA*

<sup>c</sup> *Cleveland Clinic Abu Dhabi (CCAD), Abu Dhabi, UAE*

<sup>d</sup> *The Malta College of Arts, Science & Technology, Paola, Malta*

\* *Corresponding Author. E-mail: [mohammad.qasaimeh@nyu.edu](mailto:mohammad.qasaimeh@nyu.edu)*

# Supplementary Table

**Table S1** Summary of health, demographic, and DEP study data from 15 healthy individuals and 31 diabetic patients enrolled in the study.

| Acronym | Legend               | Acronym | Legend                                    | Acronym | Legend                       |
|---------|----------------------|---------|-------------------------------------------|---------|------------------------------|
| G       | Gender               | M       | Medications                               | CC      | Cardiovascular Complications |
| DOB     | Date of Birth        | G       | Glycemia                                  | ST      | Statin Therapy               |
| H       | Height               | P       | Pregnant                                  | KC      | Kidney Complication          |
| W       | Weight               | S       | Smoking (N=Never, E=Ex-smoker, S=Smoking) | S       | Strain                       |
| BMI     | Body Mass Index      | A       | Alcohol Consumption (N, P, O, R)          | SF      | Stretch Factor               |
| A       | Age                  | PH      | Physical Activity (30, M2, L2, O, N)      | CD      | Cell Diameter                |
| SCA     | Sickle Cell Anemia   | GM      | Blood Glucose Monitoring                  | RT      | Relaxation Time              |
| Hb      | HbA1c                | II      | Regular Insulin Injection                 | NS      | Normalized Strain            |
| Th      | Thalassemia          | BSCM    | Blood Sugar Control Medication            | NSF     | Normalized Stretch Factor    |
| SCL     | Serum Creatine Level | DFH     | Diabetes Family History                   | I-S-A   | Insulin, Synjerdy, Ameryl    |
| H#      | Healthy Individual   | D#      | Diabetic Patient                          | ---     | No Data on Record            |

| ID  | Biological Data |    |     |    |      | Medical Data |     |     |     | Medical Review |   |    |    |     |          |         |    |     |        | DEP Study Data |       |       |       |       |       |
|-----|-----------------|----|-----|----|------|--------------|-----|-----|-----|----------------|---|----|----|-----|----------|---------|----|-----|--------|----------------|-------|-------|-------|-------|-------|
|     | G               | A  | H   | W  | BMI  | SCL          | Hb  | M   | G   | S              | A | PH | GM | II  | BS<br>CM | DF<br>H | CC | ST  | K<br>C | S              | SF    | CD    | RT    | NS    | NSF   |
| H1  | F               | 32 | 173 | 71 | 23.7 | ---          | --- | --- | --- | N              | O | 30 | Y  | --- | ---      | N       | N  | N   | N      | 0.407          | 1.007 | 6.101 | 0.58  | 1.272 | 3.145 |
| H2  | M               | 37 | 178 | 80 | 25.2 | ---          | --- | --- | --- | N              | O | 30 | N  | --- | ---      | N       | N  | N   | N      | 0.592          | 1.514 | 6.162 | 0.62  | 2.608 | 6.666 |
| H3  | F               | 35 | 162 | 82 | 31.2 | ---          | --- | --- | --- | N              | O | M2 | N  | --- | ---      | N       | N  | N   | N      | 0.647          | 1.458 | 6.908 | 0.48  | 2.766 | 6.231 |
| H4  | F               | 26 | 150 | 70 | 31.1 | ---          | --- | --- | --- | N              | N | L2 | N  | --- | ---      | Y       | N  | N   | N      | 0.693          | 1.54  | 6.4   | 0.527 | 2.101 | 4.67  |
| H5  | M               | 33 | 168 | 76 | 26.9 | ---          | --- | --- | --- | Y              | O | N  | N  | --- | ---      | Y       | N  | N   | N      | 0.417          | 0.953 | 6.413 | 0.715 | 1.59  | 3.636 |
| H6  | F               | 32 | 160 | 60 | 23.4 | ---          | --- | --- | --- | E              | O | O  | N  | --- | ---      | N       | N  | N   | N      | 0.193          | 0.901 | 5.475 | 0.862 | 0.731 | 3.416 |
| H7  | M               | 36 | 188 | 97 | 27.4 | ---          | --- | --- | --- | E              | O | M2 | N  | --- | ---      | N       | N  | N   | N      | 0.795          | 1.315 | 7.544 | 0.641 | 4.845 | 8.01  |
| H8  | F               | 38 | 160 | 57 | 22.3 | ---          | --- | --- | --- | N              | N | N  | N  | --- | ---      | ---     | N  | --- | ---    | 1.002          | 1.671 | 7.822 | 0.582 | 2.333 | 3.891 |
| H9  | F               | 32 | 154 | 53 | 22.3 | ---          | --- | --- | --- | N              | N | O  | N  | --- | ---      | N       | N  | N   | N      | 0.634          | 1.747 | 8.357 | 0.664 | 1.324 | 3.65  |
| H10 | F               | 34 | 150 | 53 | 23.6 | ---          | --- | --- | --- | N              | N | O  | N  | --- | ---      | Y       | N  | N   | N      | 0.92           | 1.685 | 7.345 | 0.846 | 1.577 | 2.888 |

# Supplementary Table

|     |   |    |     |     |      |      |     |        |     |   |   |         |   |     |     |   |   |   |     |       |       |        |       |       |       |
|-----|---|----|-----|-----|------|------|-----|--------|-----|---|---|---------|---|-----|-----|---|---|---|-----|-------|-------|--------|-------|-------|-------|
| H11 | M | 35 | 173 | 72  | 24.1 | ---  | --- | ---    | --- | S | O | E       | N | --- | --- | N | N | N | N   | 0.625 | 1.492 | 7.369  | ---   | 1.577 | 3.764 |
| H12 | F | 58 | 166 | 72  | 26.1 | ---  | --- | ---    | --- | S | O | 30      | N | --- | --- | Y | N | N | N   | 0.747 | 1.708 | 7.168  | ---   | 1.865 | 4.269 |
| H13 | F | 32 | 155 | 65  | 27.1 | ---  | --- | ---    | --- | N | N | M2      | N | --- | --- | Y | N | N | N   | 0.688 | 1.575 | 6.205  | ---   | 1.868 | 4.276 |
| H14 | M | 50 | 185 | 90  | 26.3 | ---  | --- | ---    | --- | E | O | L2      | N | --- | --- | N | N | Y | N   | 0.519 | 1.415 | 6.175  | ---   | 2.172 | 5.923 |
| H15 | F | 62 | 153 | 85  | 36.3 | ---  | --- | ---    | --- | N | N | O       | N | --- | --- | Y | N | N | N   | 0.634 | 1.747 | 8.882  | ---   | 2.69  | 7.417 |
| D1  | M | 62 | 177 | 100 | 31.9 | 83   | 7.9 | I-S-A* | U   | S | O | O       | Y | Y   | Y   | Y | N | Y | N   | 0.452 | 0.867 | 8.489  | 0.67  | 0.645 | 1.238 |
| D2  | M | 70 | 165 | 80  | 29.4 | 100  | 6.9 | I-S-A* | C   | N | N | 30      | Y | Y   | Y   | Y | Y | N | Y   | 0.312 | 0.842 | 7.726  | 0.65  | 0.509 | 1.377 |
| D3  | M | 63 | 169 | 140 | 49   | 68   | 6   | I-S-A* | C   | E | P | 30      | Y | N   | Y   | N | N | N | N   | 0.417 | 0.883 | 7.298  | 0.63  | 0.905 | 1.914 |
| D4  | M | 72 | 172 | 76  | 25.7 | 77.4 | 6.3 | I-S-A* | C   | N | N | O       | Y | Y   | N   | Y | Y | Y | --- | 0.693 | 1.225 | 8.002  | 0.536 | 1.782 | 3.152 |
| D5  | M | 69 | 172 | 90  | 30.4 | 151  | 9   | I-S-A* | U   | E | P | 30      | Y | Y   | Y   | Y | Y | Y | Y   | 0.262 | 0.84  | 8.575  | 0.673 | 0.511 | 1.639 |
| D6  | M | 69 | 177 | 76  | 24.3 | 72   | 6.4 | I-S-A* | C   | E | N | O       | N | N   | Y   | Y | Y | Y | Y   | 0.22  | 0.902 | 6.961  | 0.535 | 0.348 | 1.431 |
| D7  | F | 77 | 152 | 81  | 35.1 | 89   | 6.9 | I-S-A* | C   | N | N | O       | N | N   | Y   | Y | N | Y | Y   | 0.171 | 0.737 | 7.372  | 0.639 | 0.506 | 2.186 |
| D8  | M | 55 | 173 | 80  | 26.7 | 73   | 7.5 | I-S-A* | U   | N | N | M2      | Y | N   | Y   | Y | Y | Y | N   | 0.101 | 0.699 | 8.17   | 0.542 | 0.253 | 1.744 |
| D9  | M | 66 | 191 | 91  | 24.9 | Nor  | 6.2 | I-S-A* | C   | E | O | M3<br>O | Y | N   | Y   | Y | N | Y | N   | 0.44  | 1.21  | 6.626  | 0.562 | 0.807 | 2.218 |
| D10 | F | 58 | 151 | 81  | 35.5 | 53   | 7.2 | I-S-A* | C   | N | N | O       | Y | Y   | Y   | Y | N | Y | N   | 0.271 | 0.819 | 8.353  | 0.615 | 0.933 | 2.817 |
| D11 | M | 47 | 158 | 60  | 24   | 119  | 6.6 | I-S-A* | C   | N | N | M2      | N | N   | Y   | Y | Y | Y | Y   | 0.158 | 0.684 | 11.48  | 0.889 | 0.272 | 1.174 |
| D12 | F | 54 | 164 | 116 | 43.1 | ---  | 7.6 | I-S-A* | C   | N | N | O       | Y | N   | Y   | Y | N | Y | N   | 0.203 | 1.02  | 10.914 | 0.818 | 0.134 | 0.674 |
| D13 | M | 69 | 160 | 79  | 30.9 | 133  | 10  | I-S-A* | U   | E | N | M3<br>O | Y | Y   | Y   | Y | Y | Y | Y   | 0.371 | 1.123 | 9.28   | 0.661 | 0.286 | 0.864 |
| D14 | M | 45 | 179 | 134 | 41.8 | 141  | 7.9 | I-S-A* | U   | E | P | O       | Y | Y   | Y   | Y | N | Y | Y   | 0.176 | 0.76  | 11.336 | 0.823 | 0.22  | 0.951 |
| D15 | M | 78 | 175 | 74  | 24.2 | 78   | 6.2 | I-S-A* | C   | E | N | M3<br>O | N | N   | Y   | N | N | Y | N   | 0.41  | 1.181 | 11.07  | 0.896 | 0.282 | 0.811 |
| D16 | F | 37 | 163 | 83  | 31.2 | 27.9 | 6   | I-S-A* | C   | E | N | N       | Y | N   | Y   | Y | N | N | N   | 0.32  | 1.149 | 8.15   | 0.375 | 0.236 | 0.847 |
| D17 | M | 45 | 160 | 84  | 32.8 | 77   | 6   | I-S-A* | C   | N | N | N       | N | N   | Y   | Y | N | Y | N   | 0.611 | 1.149 | 9.512  | 0.788 | 1.129 | 2.123 |
| D18 | M | 35 | 167 | 69  | 24.7 | Nor  | 10  | I-S-A* | U   | N | N | M3<br>O | Y | Y   | Y   | Y | N | Y | N   | 0.258 | 0.933 | 8.742  | 0.666 | 0.299 | 1.084 |
| D19 | M | 76 | 168 | 80  | 28.3 | ---  | 7.1 | I-S-A* | C   | E |   | N       | Y | Y   | Y   | Y | Y | Y | Y   | 0.511 | 1.203 | 9.53   | 0.709 | 0.765 | 1.8   |
| D20 | F | 67 | 154 | 58  | 24.5 | 84   | 5.4 | I-S-A* | C   | N | N | O       | Y | N   | N   | Y | Y | Y | N   | 0.272 | 0.849 | 9.701  | 0.841 | 0.314 | 0.98  |

# Supplementary Table

|     |   |    |     |     |      |     |      |        |     |   |   |         |   |   |   |     |   |   |   |       |       |        |       |       |       |
|-----|---|----|-----|-----|------|-----|------|--------|-----|---|---|---------|---|---|---|-----|---|---|---|-------|-------|--------|-------|-------|-------|
| D21 | F | 55 | 156 | 75  | 30.8 | 51  | 7.7  | I-S-A* | U   | N | N | M2      | Y | Y | Y | Y   | Y | Y | Y | 0.419 | 1.313 | 6.938  | 0.837 | 0.459 | 1.438 |
| D22 | M | 77 | 163 | 108 | 40.6 | --- | ---  | I-S-A* | --- | E | N | L2      | Y | Y | Y | --- | N | Y | Y | 0.366 | 0.867 | 9.729  | 0.541 | 1.096 | 2.597 |
| D23 | M | 61 | 162 | 101 | 38.5 | 64  | 7.6  | I-S-A* | U   | E | N | L2      | Y | Y | Y | Y   | N | Y | Y | 0.395 | 1.052 | 10.295 | 0.442 | 0.429 | 1.142 |
| D24 | M | 52 | 160 | 80  | 31.3 | --- | 7.6  | I-S-A* | C   | E | N | O       | Y | Y | Y | Y   | Y | Y | N | 0.315 | 0.99  | 10.941 | 0.919 | 0.288 | 0.907 |
| D25 | F | 85 | 147 | 81  | 37.5 | 94  | 6.4  | I-S-A* | C   | N | N | O       | Y | N | Y | Y   | Y | Y | Y | 0.319 | 0.983 | 9.507  | 0.986 | 0.244 | 0.751 |
| D26 | M | 45 | 169 | 81  | 28.4 | 86  | 10.1 | I-S-A* | U   | E | P | O       | Y | Y | Y | Y   | N | N | N | 0.41  | 1.286 | 6.403  | 0.821 | 0.477 | 1.497 |
| D27 | M | 81 | 166 | 102 | 37   | --- | 7.1  | I-S-A* | U   | N | N | M3<br>O | Y | N | Y | N   | Y | Y | Y | 0.338 | 0.8   | 9.291  | 0.5   | 1.286 | 3.048 |
| D28 | F | 53 | 155 | 81  | 33.7 | 36  | 9.6  | I-S-A* | U   | S | N | N       | Y | Y | Y | Y   | N | Y | N | 0.377 | 1.005 | 7.874  | 0.633 | 0.47  | 1.253 |
| D29 | M | 71 | 165 | 65  | 23.9 | --- | 6.2  | I-S-A* | C   | N | O | M3<br>O | Y | N | Y | Y   | N | Y | Y | 0.586 | 1.476 | 5.753  | ---   | 1.201 | 3.023 |
| D30 | F | 50 | 159 | 77  | 30.5 | 48  | 7    | I-S-A* | C   | N | N | O       | N | N | Y | Y   | N | Y | N | 0.29  | 1.02  | 7.905  | ---   | 1.524 | 5.358 |
| D31 | M | 58 | 167 | 98  | 35.1 | 83  | 6.7  | I-S-A* | C   | N | N | O       | Y | N | Y | Y   | N | Y | N | 0.63  | 1.184 | 6.101  | ---   | 1.274 | 2.396 |
